# Supplementary material for: An efficient and thermally stable near-infrared phosphor derived from the Ln3ScInGa3O12:Cr3+ (Ln = La, Gd, Y, and Lu) garnet family
Source: Royal Society of Chemistry journal article supplement (doi:10.1039/d2dt04126j), 2023-01-01
Supplement: d2dt04126j1.pdf [file d2dt04126j1.pdf]

## Supporting Information

### **An efficient and thermally stable near-infrared phosphor derives from $\text{Ln}_3\text{ScInGa}_3\text{O}_{12}:\text{Cr}^{3+}$ (Ln=La, Gd, Y, and Lu) garnet family**

Zurong Liao<sup>a</sup>, Chaojie Li<sup>a</sup>, Jiyou Zhong<sup>a,\*</sup>, Yang Li<sup>b</sup>, and Weiren Zhao<sup>a,c\*</sup>

<sup>a</sup>School of Physics and Optoelectronic Engineering, Guangdong University of Technology, Guangzhou 510006, China. E-mail:[zhongjiyou@126.com](mailto:zhongjiyou@126.com); [zwren123@126.com](mailto:zwren123@126.com).

<sup>b</sup>School of Basic Medical Sciences Guangzhou Medical University Guangzhou, Guangdong, 510182, China.

<sup>c</sup>School of Chemical Engineering and Light Industry Guangdong University of Technology, Guangzhou, 510006, China.

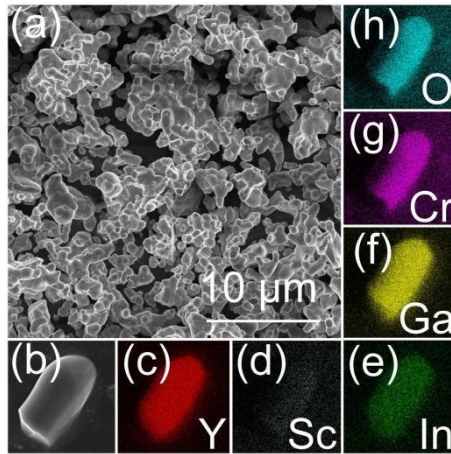

**Fig. S1.** (a) SEM image and (b-h) EDS elemental mapping on a single particle of  $\text{Y}_3\text{Sc}_{0.97}\text{In}_{0.97}\text{Cr}_{0.06}\text{Ga}_3\text{O}_{12}$  sample.

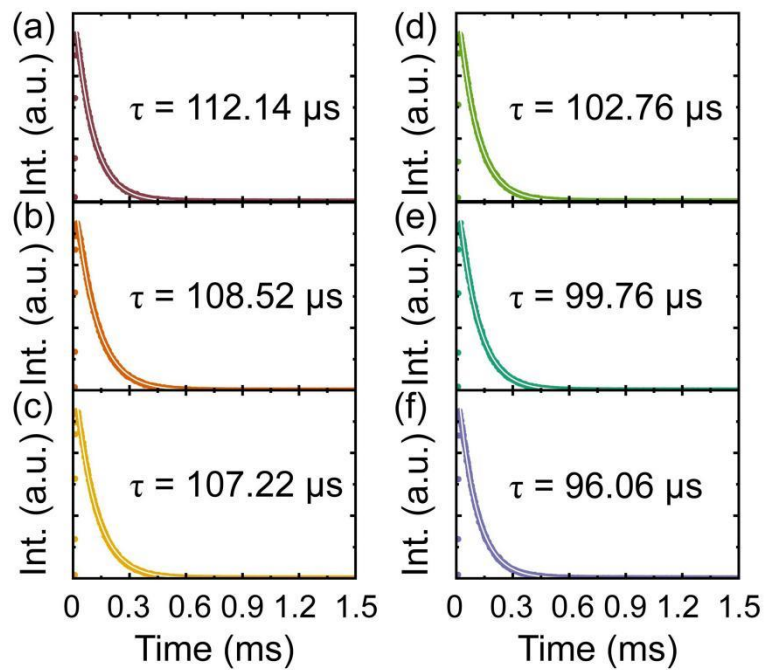

**Fig. S2.** (a-f) Decay curves fitted by single-exponential function of  $\text{Y}_3\text{Sc}_{1-x/2}\text{In}_{1-x/2}\text{Ga}_3\text{O}_{12}:x\text{Cr}^{3+}$  ( $x = 0.01-0.10$ ) samples.

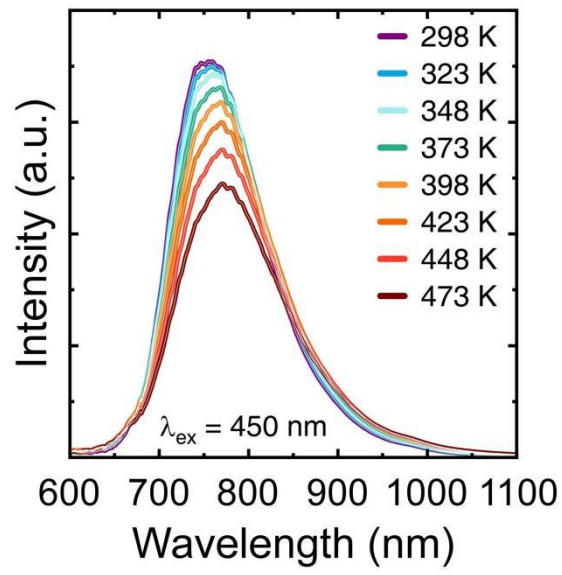

**Fig. S3.** Temperature-dependent emission spectra of  $\text{Y}_3\text{Sc}_{0.97}\text{In}_{0.97}\text{Ga}_3\text{O}_{12}:0.06\text{Cr}^{3+}$  samples excited by 450 nm.

**Table S1** The refined atomic positions of  $Y_3ScInGa_3O_{12}$  host.

| atom  | Wyck. position | Occ. | x          | y          | z          |
|-------|----------------|------|------------|------------|------------|
| Y(1)  | 24c            | 1    | 0.12500(0) | 0          | 0.25000(0) |
| Sc    | 16a            | 0.5  | 0          | 0          | 0          |
| In    | 16a            | 0.5  | 0          | 0          | 0          |
| Ga(1) | 24d            | 1    | 0.37500(0) | 0          | 0.25000(0) |
| O(1)  | 96h            | 1    | 0.09580(4) | 0.18990(3) | 0.27852(3) |

**Table S2.** The detailed input and output parameters for  $Y_3Sc_{0.97}In_{0.97}Ga_3O_{12}:0.06Cr^{3+}$ -containing device.

| Current (mA) | Total input power (mW) | Total output power (mW) | Blue light output power (mW) | NIR output power (mW) | NIR photoelectric efficiency (%) |
|--------------|------------------------|-------------------------|------------------------------|-----------------------|----------------------------------|
| 25           | 65.89                  | 12.28                   | 3.98                         | 8.30                  | 12.59                            |
| 50           | 135.10                 | 24.07                   | 7.81                         | 16.26                 | 12.04                            |
| 75           | 207.30                 | 35.21                   | 11.40                        | 23.81                 | 11.49                            |
| 100          | 282.40                 | 46.01                   | 14.94                        | 31.07                 | 11.00                            |
| 125          | 359.30                 | 56.30                   | 18.29                        | 38.01                 | 10.58                            |
| 150          | 438.90                 | 65.90                   | 21.34                        | 44.56                 | 10.15                            |
| 175          | 520.50                 | 75.23                   | 24.33                        | 50.90                 | 9.78                             |
| 200          | 603.30                 | 84.11                   | 27.20                        | 56.91                 | 9.43                             |
| 225          | 687.70                 | 93.41                   | 30.36                        | 63.05                 | 9.17                             |
| 250          | 775.40                 | 101.10                  | 32.77                        | 68.33                 | 8.81                             |
| 275          | 863.70                 | 108.90                  | 35.28                        | 73.62                 | 8.52                             |
| 300          | 953.10                 | 116.20                  | 37.61                        | 78.59                 | 8.25                             |
| 325          | 1045.00                | 124.40                  | 40.38                        | 84.02                 | 8.04                             |
| 350          | 1138.00                | 131.20                  | 42.55                        | 88.65                 | 7.79                             |
